# Supplementary material for: Preclinical Study of Novel Gene Silencer Pyrrole-Imidazole Polyamide Targeting Human TGF-β1 Promoter for Hypertrophic Scars in a Common Marmoset Primate Model
Source: PubMed Central journal article supplement (PMC4418757; doi:10.1371/journal.pone.0125295), 2015-05-04
Supplement: pone.0125295.s001.pdf [file pone.0125295.s001.pdf]

**S1 Figure**

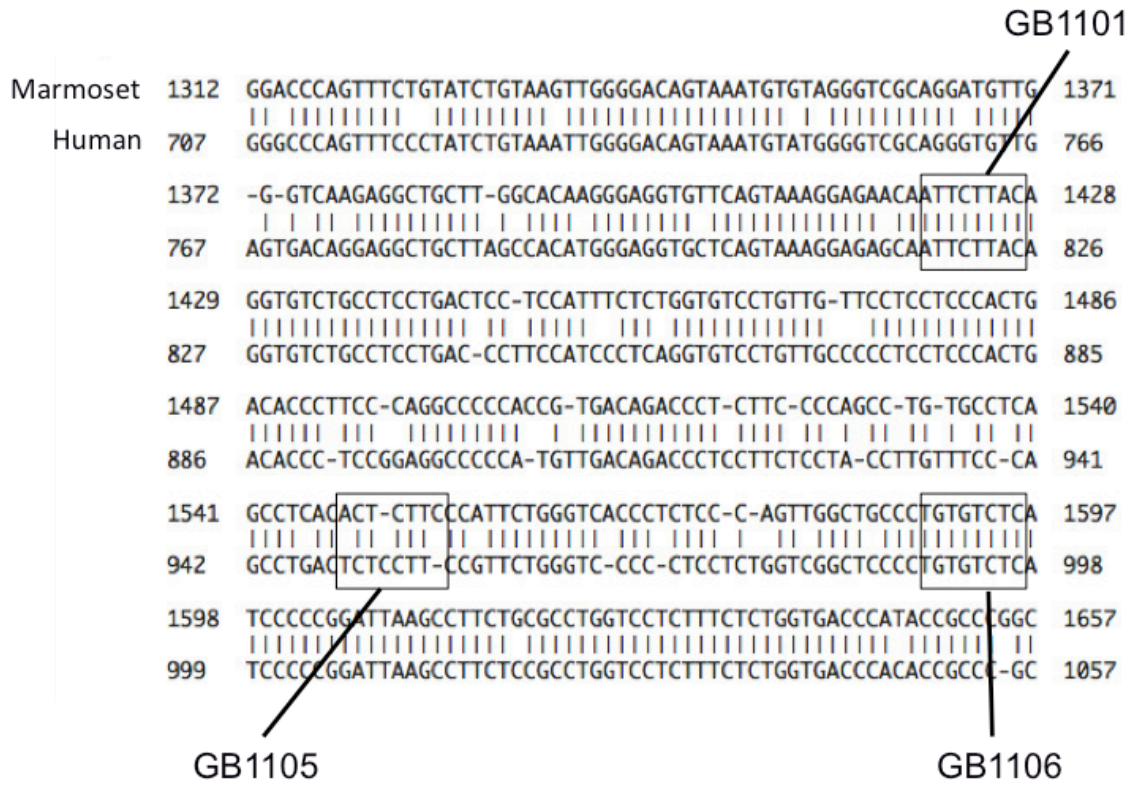

Sequences of human and marmoset transforming growth factor (TGF)- $\beta$ 1 promoter analyzed by NCBI BLAST Two-Sequence Analysis. Binding sites (box) of GB1101, GB1105 and GB1106 on the human and marmoset TGF- $\beta$ 1 promoter.
