# Supplementary material for: Preclinical Study of Novel Gene Silencer Pyrrole-Imidazole Polyamide Targeting Human TGF-β1 Promoter for Hypertrophic Scars in a Common Marmoset Primate Model
Source: PubMed Central journal article supplement (PMC4418757; doi:10.1371/journal.pone.0125295), 2015-05-04
Supplement: pone.0125295.s002.pdf [file pone.0125295.s002.pdf]

**S2 Figure**

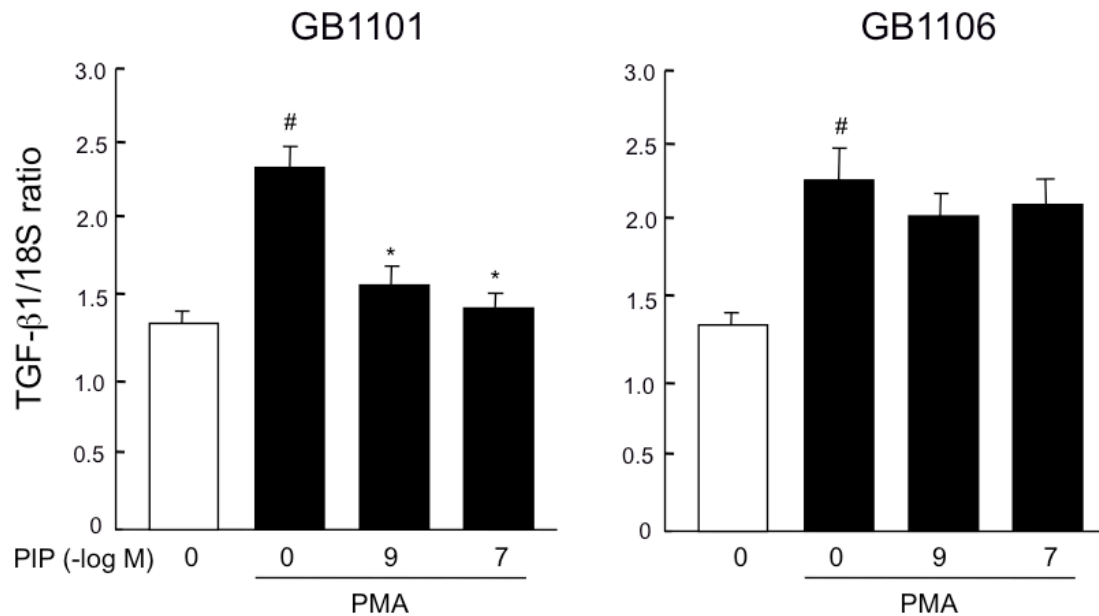

Effects of pyrrole-imidazole (PI) polyamides (GB1101 and GB1106) targeting the human transforming growth factor (TGF)- $\beta$ 1 promoter on expression of TGF- $\beta$ 1 mRNA in marmoset fibroblasts. Marmoset fibroblasts were incubated with  $10^{-9}$  and  $10^{-7}$  M PI polyamides (PIP) targeting human TGF- $\beta$ 1 in the presence or absence of  $10^{-6}$  M phorbol 12-myristate 13-acetate (PMA). Total RNA was extracted, and the expression of TGF- $\beta$ 1mRNAs was evaluated by real time polymerase chain reaction analysis. Data are mean  $\pm$  SEM (n = 4). \*  $p < 0.05$  vs. PMA without PI polyamide. #  $p < 0.05$  vs. without PMA.
